# Supplementary material for: Hippocampal theta codes for distances in semantic and temporal spaces
Source: bioRxiv or medRxiv preprint supplement (doi:10.1101/611681), 2019-04-18
Supplement: Supplementary file [file media-1.pdf]

## Supplemental Information (3 figures)

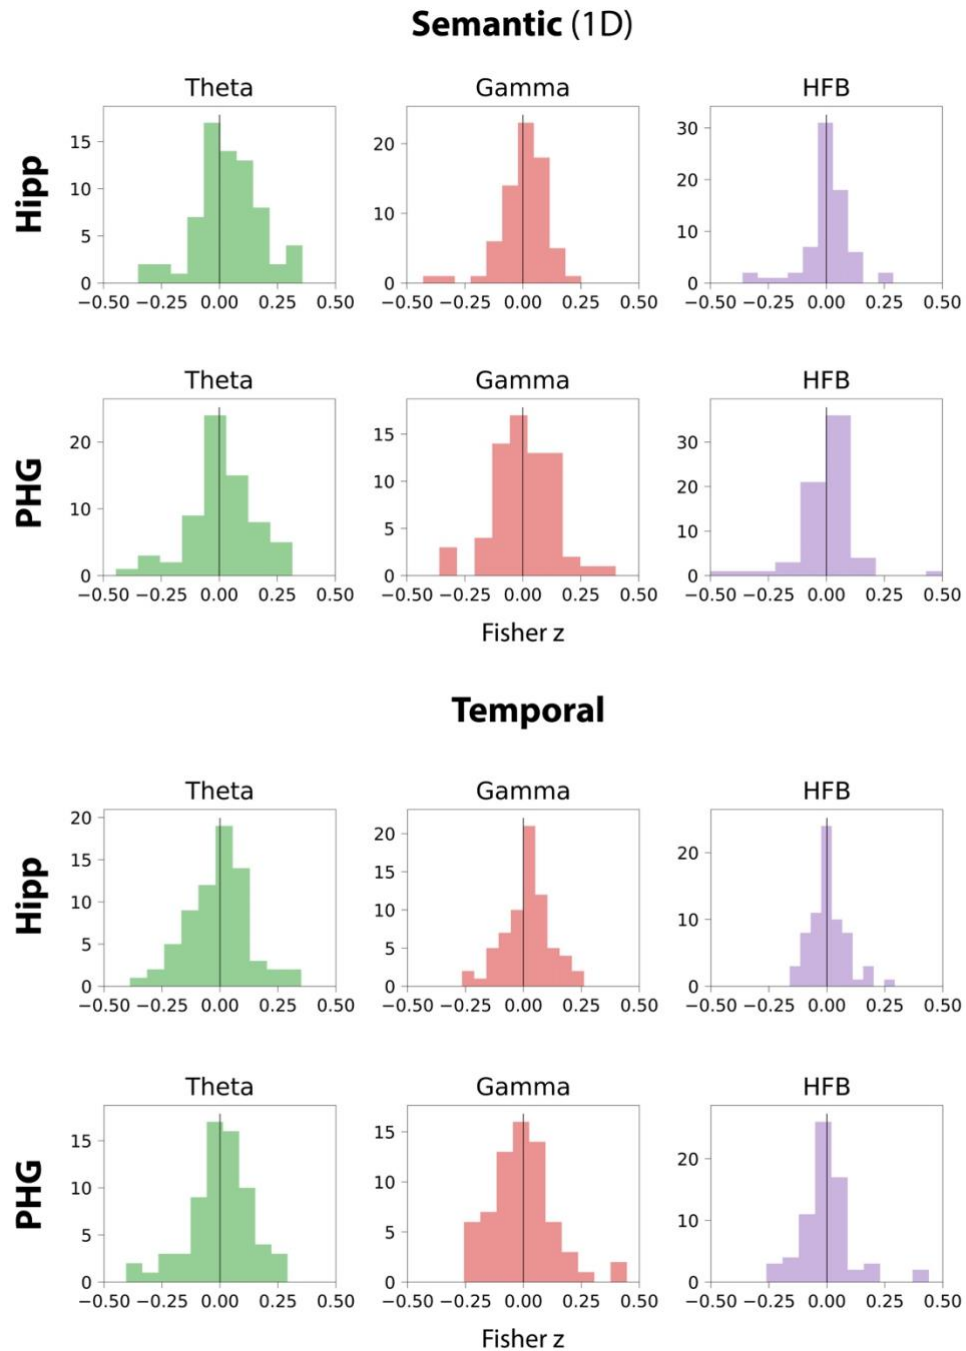

**Figure S1. Distribution of subject correlations** (Fisher z-transformed) for each region-feature-frequency combination. Data are summarized as bar plots in Figure 4. Theta (4-8 Hz), gamma (30-55 Hz), high-frequency broadband (HFB; 70-150 Hz). Only hippocampal theta (top left) was significantly predictive of semantic transition distances in 1-D spaces.

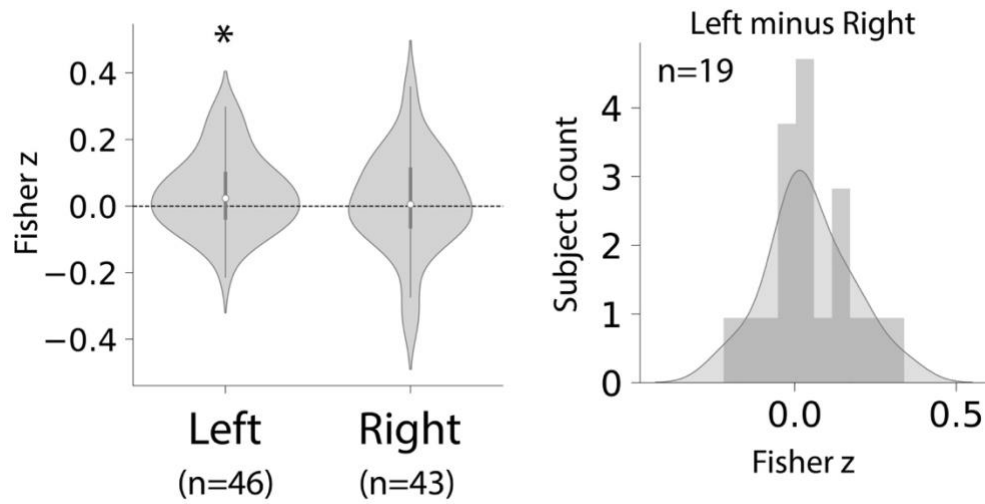

**Figure S2. Differences in theta power between left and right hippocampus.** *Left:* The correlation between hippocampal theta and semantic transition distance in (A) is driven primarily by activity in the left hippocampus; tested separately, left hippocampus (n=46 subjects) show a significant effect  $t(45)=2.29$ ,  $P=0.027$ , unlike the right  $t(42)=0.60$ ,  $P=0.55$ . *Right:* Testing for differences within subjects with bilateral hippocampal coverage, theta-distance correlations are higher in the left than the right, but not significantly so ( $t(18)=1.49$ ,  $P=0.15$ ).

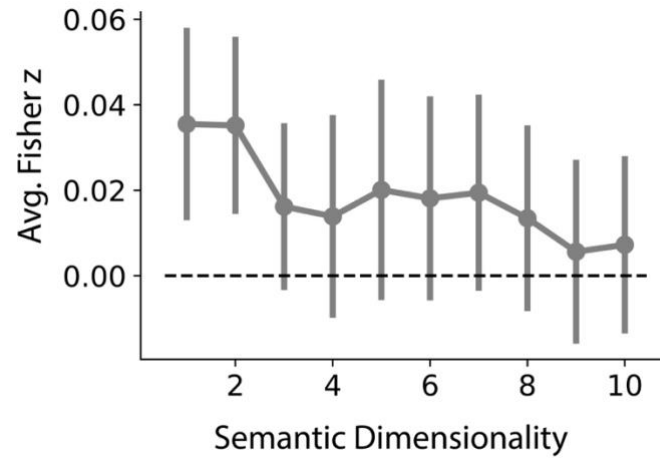

**Figure S3.** Population-level correlation between hippocampus-PHG theta coupling and semantic distance at varying dimensionalities, with MTL theta power regressed out. Same analysis as Figure 5E, though hippocampus-PHG phase locking was residualized on MTL theta power prior to correlation with semantic distance. One-dimension,  $t=1.58$ ,  $P=0.12$ ; two-dimensions,  $t=1.70$ ,  $P=0.09$ .
